# Supplementary material for: One-step reduction and PEIylation of PEGylated nanographene oxide for highly efficient chemo-photothermal therapy
Source: Royal Society of Chemistry journal article supplement (doi:10.1039/c6tb00486e), 2016-01-01
Supplement: c6tb00486e1.pdf [file c6tb00486e1.pdf]

## Electronic Supplementary Information (ESI)

### One step reduction and PEIylation of PEGylated nanographene oxide for high-efficient chemo-photothermal therapy

Tan Li<sup>a</sup>, Hongyu Liu<sup>a</sup>, Gaina Xi<sup>a</sup>, Yilin Pang<sup>a</sup>, Liping Wu<sup>a</sup>, Xiaoping Wang<sup>b, \*</sup>, Tongsheng Chen<sup>a, \*</sup>

<sup>a</sup> MOE Key Laboratory of Laser Life Science & College of Biophotonics, South China Normal University, Guangzhou 510631, China

<sup>b</sup> Department of Pain Management, the First Affiliated Hospital of Jinan University, Guangzhou 510632, China

\*Corresponding author: E-mail addresses: chentsh@scnu.edu.cn (T. Chen), txp2938@jnu.edu.cn (X. Wang); Tel.: +86 18588869936.

### Supplementary table and figures:

|                                  | Total Injected<br>Volume (μL) | Average Weight<br>of Body (g) | Concentration of<br>GO (μg/mL) | Concentration of<br>DOX (μg/mL) |
|----------------------------------|-------------------------------|-------------------------------|--------------------------------|---------------------------------|
| Group 1 (PBS)                    | 200                           | 19.6±2.4                      | —                              | —                               |
| Group 2 (DOX)                    | 200                           | 18.6±1.1                      | —                              | 472.5                           |
| Group 3 (nrGO-PEG/PEI)           | 200                           | 18.9±1.2                      | 190                            | —                               |
| Group 4 (nrGO-PEG/PEI+Laser)     | 200                           | 18.2±1.8                      | 185                            | —                               |
| Group 5 (nrGO-PEG/PE/DOX)        | 200                           | 19.3±2.2                      | 195                            | 487.5                           |
| Group 6 (nrGO-PEG/PEI/DOX+Laser) | 200                           | 19.8±2.5                      | 200                            | 500                             |

**Table S1** Corresponding concentrations of the drugs (PBS, DOX solution, nrGO-PEG/PEI suspension, nrGO-PEG/PEI/DOX suspension) before injection.

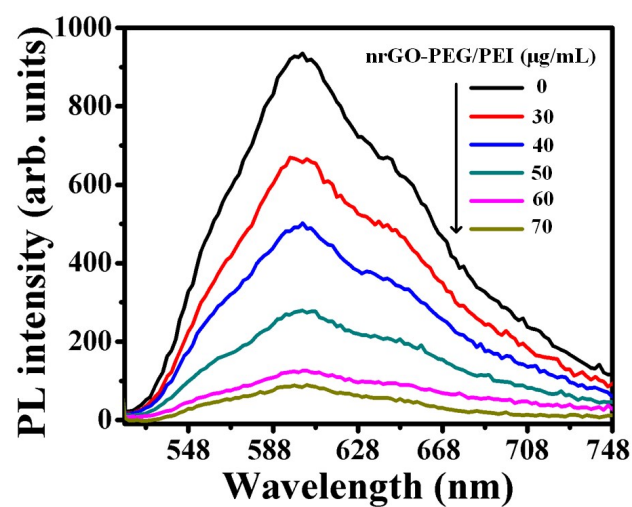

**Fig. S1** Fluorescence spectra of DOX (160 µg/mL, final concentration) mixed with different concentrations of nrGO-PEG/PEI (0, 30, 40, 50, 60, 70 µg/mL, final concentration).

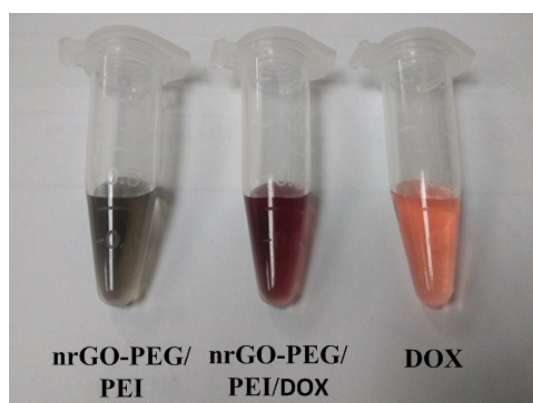

**Fig. S2** Photos of DOX, nrGO-PEG/PEI and nrGO-PEG/PEI/DOX solutions (containing 50 µg/mL of GO and 130 µg/mL DOX).

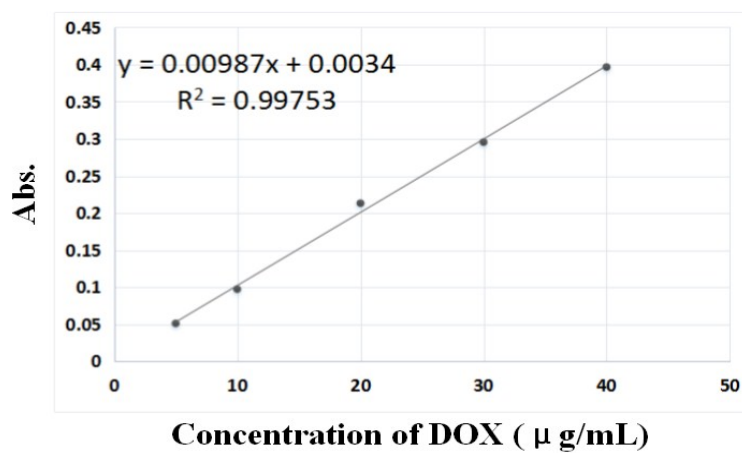

**Fig. S3** The linear absorbance curve of DOX.

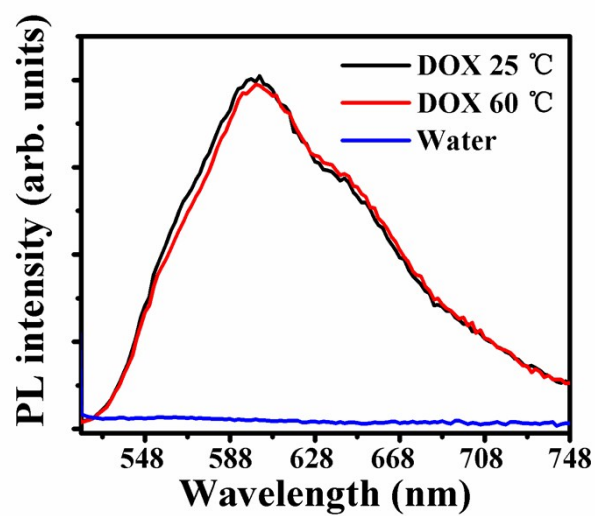

**Fig. S4** The fluorescence intensity of DOX at the concentration of 160 µg/mL under 25 and 60 °C for 600s.

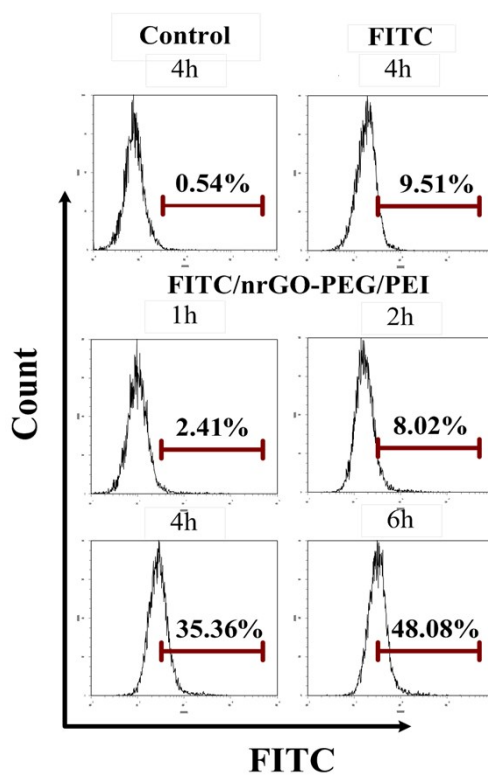

**Fig. S5** Cellular uptake ratio of nrGO-PEG/PEI. Cells were cultured with 50 µg/mL of FITC/nrGO-PEG/PEI for various times (1, 2, 4 and 6 h) before FCM analysis.

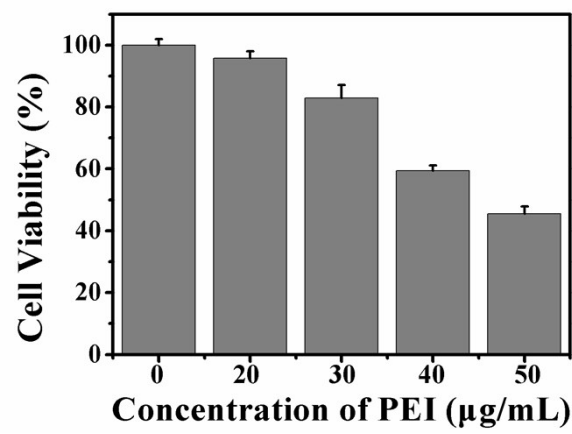

**Fig. S6** Dose-dependent toxic effect of PEI in 4T1 cells at 24 h.
